# Supplementary material for: Integrated Metabolomic and Transcriptomic Analysis Reveals the Underlying Antibacterial Mechanisms of the Phytonutrient Quercetin-Induced Fatty Acids Alteration in Staphylococcus aureus ATCC 27217
Source: MDPI journal article supplement (doi:10.3390/molecules29102266), 2024-05-11
Supplement: s1 [file s1]

# Supplementary Materials

## Contents

**Figure S1** The molecular structure of quercetin.

**Figure S2** RT-qPCR validation of selected differential expressed genes of *S. aureus* ATCC 27217 under different quercetin treatments.

**Figure S3.** The inhibition rate of quercetin and resveratrol on FabG.

**Table S1.** Primer sequences used for RT-qPCR analysis.

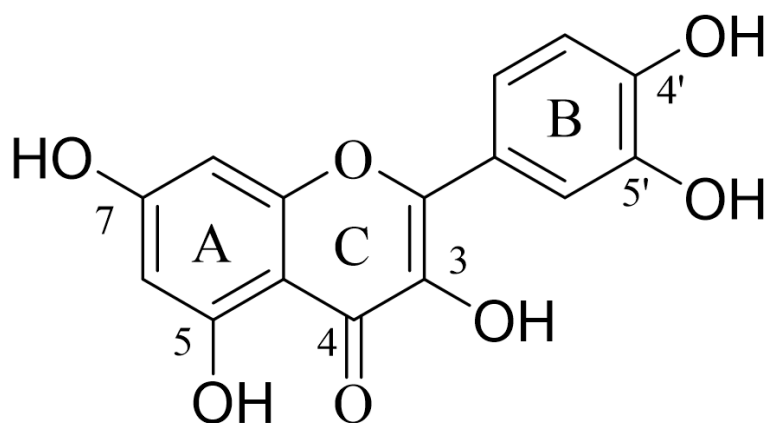

**Figure S1** The molecular structure of quercetin.

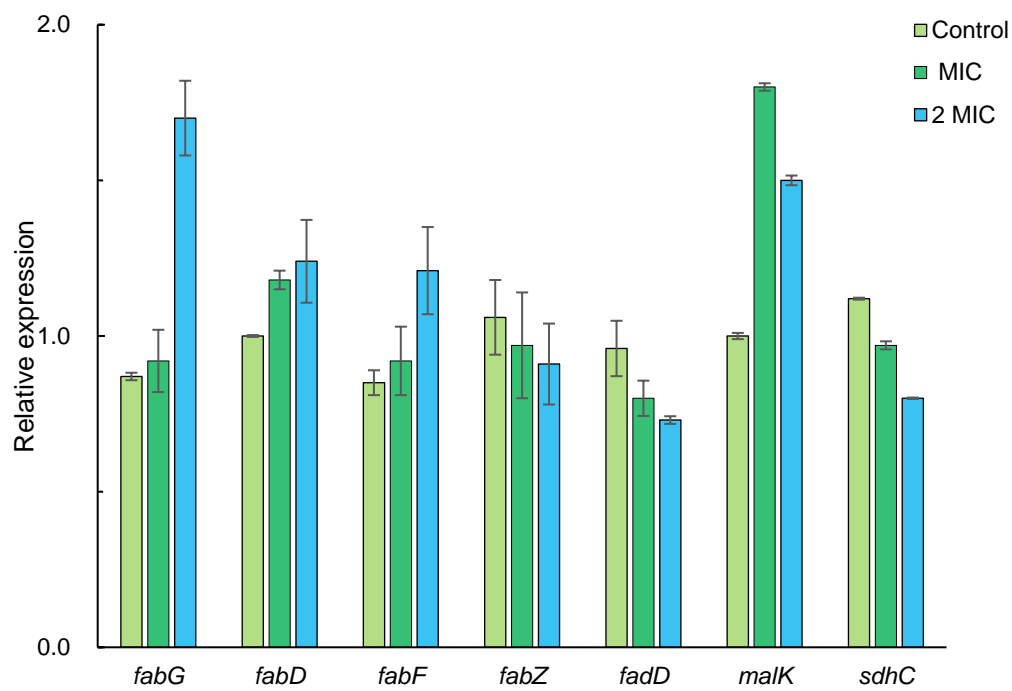

**Figure S2** RT-qPCR validation of selected differential expressed genes of *S. aureus* ATCC 27217 under different quercetin treatments. Error bars represent the standard deviations (SD) from four repeated experiments.

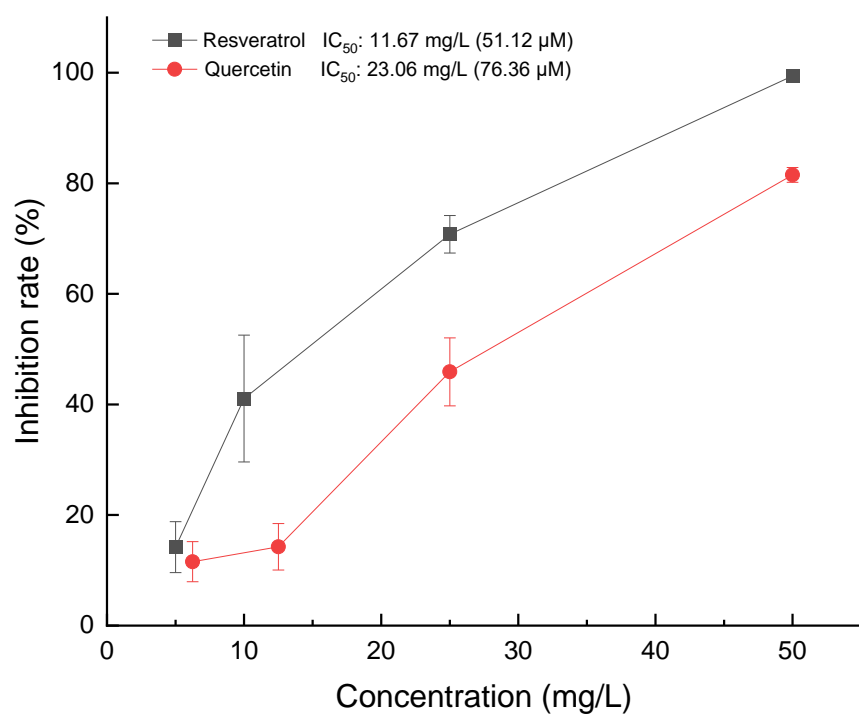

**Figure S3.** The inhibition rate of quercetin and resveratrol on FabG.

**Table S1.** Primer sequences used for RT-qPCR analysis.

| Gene        | Primer         | Sequence (5'-3')        | Length |
|-------------|----------------|-------------------------|--------|
| <i>fabG</i> | <i>fabG</i> -F | GTTGCCGATGCTGATGAAGT    | 137 bp |
|             | <i>fabG</i> -R | TCATCCCACCTCTTGTTCTTTCA |        |
| <i>fabD</i> | <i>fabD</i> -F | TTGACGCATAGTTCGGCATT    | 197 bp |
|             | <i>fabD</i> -R | ACTGCAGCCATGCTTCCTACA   |        |
| <i>fabF</i> | <i>fabF</i> -F | TTCTGGTATCGGTGGTATGGA   | 122 bp |
|             | <i>fabF</i> -R | CTTGCCCAGTTGCCATATCA    |        |
| <i>fabZ</i> | <i>fabZ</i> -F | GGTATGGGCGTCGTTACAAGTA  | 145 bp |
|             | <i>fabZ</i> -R | GCTATTAAAACGGGGATGATTG  |        |
| <i>fadD</i> | <i>fadD</i> -F | AGCAGAGACTGCCAAAGCAT    | 183 bp |
|             | <i>fadD</i> -R | CATAGCCAACGACCACACAC    |        |
| <i>malK</i> | <i>malK</i> -F | TTGCTTTGGGCAGAGCTATT    | 160 bp |
|             | <i>malK</i> -R | TGTGCCGACTTGCATAATGT    |        |
| <i>sdhC</i> | <i>sdhC</i> -F | CCTGTTGGATGCGCTATATGTC  | 181 bp |
|             | <i>sdhC</i> -R | TCCAGCGAGCCATCAGGTAA    |        |
| 16sRNA      | 16sRNA-F       | CGGTGAATACGTTTCYCGG     | 124 bp |
|             | 16sRNA-R       | GGWTACCTTGTTACGACTT     |        |
